# Supplementary material for: Maternally regulated gastrulation as a source of variation contributing to cavefish forebrain evolution
Source: eLife. 2019 Oct 31;8:e50160. doi: 10.7554/eLife.50160 (PMC6874477; doi:10.7554/eLife.50160)
Supplement: Supplementary file 1. [file elife-50160-supp1.xlsx]

## Sheet: Dkk1b
		70% epiboly
					SF											CF												Hyb SF													Hyb CF
		Distance margin leading cell				distance margin to animal extreme				Ratio			Distance margin leading cell				distance margin to animal extreme				Ratio				Distance margin leading cell				distance margin to animal extreme				Ratio					Distance margin leading cell				distance margin to animal extreme				Ratio
			296				538			0.550186				305				464			0.657328					234				551			0.424682					218					453			0.481236
			257				506			0.507905				284				563			0.50444					281				467			0.601713					465					580			0.801724
			307				584			0.525685				489				535			0.914019					272				496			0.548387					367					563			0.651865
			345				595			0.579832				462				554			0.833935					251				428			0.586449					330					514			0.642023
			248				558			0.444444				361				505			0.714851					253				457			0.553611					481					610			0.788525
			281				448			0.627232				292				486			0.600823					329				512			0.642578					277					512			0.541016
			282				479			0.588727				240				575			0.417391					329				525			0.626667					428					567			0.75485
			242				537			0.450652				410				543			0.755064					203				471			0.430998					250					438			0.570776
			337				513			0.65692				457				540			0.846296					237				462			0.512987					480					595			0.806723
			192				521			0.368522				446				584			0.763699					245				478			0.512552					290					474			0.611814
			251				452			0.55531				389				484			0.803719					268				528			0.507576					344					564			0.609929
			304				504			0.603175				356				510			0.698039					255				440			0.579545					218					437			0.498856
			383				570			0.67193				394				504			0.781746					304				464			0.655172					361					636			0.56761
			269				481			0.559252				308				522			0.590038					228				483			0.47205					338					514			0.657588
			224				438			0.511416				476				592			0.804054					234				446			0.524664					475					534			0.889513
			187				477			0.392034				241				405			0.595062					263				470			0.559574					372					465			0.8
			299				544			0.549632				423				544			0.777574					256				431			0.593968					325					456			0.712719
			220				563			0.390764				446				598			0.745819					259				494			0.524291					493					548			0.899635
			282				542			0.520295				506				588			0.860544					250				521			0.479846					440					540			0.814815
			196				438			0.447489				504				603			0.835821					228				490			0.465306					472					587			0.804089
			240				362			0.662983				400				531			0.753296					196				457			0.428884					403					580			0.694828
			277				446			0.621076																191				362			0.527624					334					555			0.601802
			340				520			0.653846																206				435			0.473563					450					560			0.803571
			266				489			0.543967																214				420			0.509524					342					521			0.65643
																										268				490			0.546939
		80% epiboly
					SF											SF
		Distance margin leading cell				distance margin to animal extreme				Ratio			Distance margin leading cell				distance margin to animal extreme				Ratio
			419				601			0.697171				546					635		0.859843
			525				626			0.838658				488					542		0.900369
			444				544			0.816176				597					626		0.953674
					no
			426				552			0.771739
			420				551			0.76225
			417				486			0.858025
			498				557			0.894075
			374				587			0.637138				544					599		0.90818
			342				526			0.65019				542					592		0.915541
			345				520			0.663462				482					553		0.871609
			284				579			0.490501				529					589		0.898132
			522				649			0.804314				628					639		0.982786
			483				695			0.694964				375					522		0.718391
			340				510			0.666667				556					623		0.892456
			383				525			0.729524				530					644		0.822981
					NO									514					642		0.800623
			459				580			0.791379				633					634		0.998423
			414				516			0.802326				595					628		0.947452
			367				574			0.639373				385					511		0.753425
			479				649			0.738059				493					544		0.90625
			322				548			0.587591				637					663		0.960784
			362				670			0.540299				490					591		0.829103
			379				697			0.543759				585					612		0.955882
			441				512			0.861328				608					644		0.944099
			550				644			0.854037				486					574		0.84669
			469				560			0.8375				468					655		0.714504
			498				659			0.75569
			384				499			0.769539
			378				584			0.64726
			460				629			0.73132

## Sheet: Shh
			70%epiboly
			SF											CF
Embryo		Distance leading cell			Distance animal pole				width	total width			Distance leading cell			Distance animal pole		Ratio		width	total width	ratio
		127			520		0.244231		164	675	0.242963		204			487		0.418891		145	666	0.217718
													138			447		0.308725		155	678	0.228614
													143			448		0.319196		135	599	0.225376
		112			513		0.218324		170	623	0.272873		166			500		0.332		168	578	0.290657
		162			536		0.302239		198	608	0.325658		174			472		0.368644		174	614	0.283388
		154			487		0.316222		209	630	0.331746
		197			544		0.362132		150	612	0.245098
		108			496		0.217742		308	612	0.503268		190			399		0.47619		169	666	0.253754
		120			494		0.242915		171	626	0.273163		223			418		0.533493		197	655	0.300763
		145			547		0.265082		192	603	0.318408		145			408		0.355392		209	629	0.332273
													169			503		0.335984		209	640	0.326562
													190			464		0.409483		236	649	0.363636
		142.571			516.714								151			404		0.373762		176	612	0.287582
													169			488		0.346311		220	647	0.340031
													135			442		0.30543		179	604	0.296358
													153			388		0.39433		202	591	0.341794
													167.857			447.714
			80%epiboly
			SF											CF
		Distance leading cell			Distance animal pole								Distance leading cell			Distance animal pole
		163			532		0.306391						199			457		0.435449
		132			469		0.28145						165			458		0.360262
		138			480		0.2875						411			518		0.793436
		120			500		0.24						325			544		0.597426
		124			486		0.255144						195			599		0.325543
		114			480		0.2375						396			671		0.590164
		132			574		0.229965						383			648		0.591049
		80			472		0.169492						365			510		0.715686
		154			619		0.248788
		99			458		0.216157
		142			469		0.302772
		127.091			503.545								304.875			550.625

## Sheet: GscGFP
		50%epib
										70% epibo
	SF				CF
										SF				CF
	margin to leading cell				margin to leading cell
										margin to leading cell				margin to leading cell
	152				147
	141				135
	110				140					298				405
	97				157					252				340
	96				179					303				434
	152				283					302				440
	120				169					321				377
	127				171					251				548
	105				169					299				345
	135				209					366				450
	101				169					290				355
	110				186					241				410
					142					355				447
					296									376
					133									420
					170									437
														471
														395
														482
														371
														468
														381
														553
														471
														426.182

## Sheet: ntl
									70%epiboly
		SF									CF										Hyb SF										Hyb CF
	Distance leading cell			distance animal extreme			Ratio			Distance leading cell			distance animal extreme			Ratio				Distance leading cell			distance animal extreme				Ratio			Distance leading cell			distance animal extreme				Ratio
Exp1
	218				496		0.439516			279				406		0.687192
	214				488		0.438525			275				423		0.650118
	184				532		0.345865			281				526		0.534221
	351				576		0.609375			372				532		0.699248
	349				526		0.663498			334				549		0.608379
	331				580		0.57069			260				511		0.508806
	316				591		0.534687			315				489		0.644172
	198				517		0.382979			325				469		0.692964
	213				576		0.369792			292				488		0.598361
	206				508		0.405512			351				487		0.720739
	258				539		0.476044			308.4				488		0.63442
Ex2
	305				569		0.536028			279				510		0.547059					230			514			0.447471				288			504			0.571429
	282				585		0.482051			379				518		0.73166					264			498			0.53012				274			475			0.576842
	308				544		0.566176			301				513		0.586745					231			483			0.478261				304			518			0.586873
	273				531		0.514124			327				536		0.610075					214			501			0.427146				278			481			0.577963
	213				531		0.40113			309				490		0.630612					256			451			0.567627				317			472			0.67161
	273				557		0.490126			290				469		0.618337					295			533			0.553471				329			497			0.661972
	289				584		0.494863			247				532		0.464286					181			413			0.438257				274			483			0.567288
	320				536		0.597015			251				440		0.570455															217			381			0.569554
	216				544		0.397059			424				533		0.795497															317			493			0.643002
	229				494		0.463563																								286			491			0.582485
	269				528		0.50947																								298			470			0.634043
	271				528		0.513258																								284			465			0.610753
	229				489		0.468303																								230			499			0.460922
	260				577		0.450607
	266.929				542.643		0.491698			311.889				504.556		0.617192					238.714			484.714			0.491765				284.308			479.154			0.593441
Exp julien
	162				362		0.447514			335				443		0.756208					216			349			0.618911				236			435			0.542529
	218				475		0.458947			256				462		0.554113					199			425			0.468235				315			512			0.615234
	150				470		0.319149			258				518		0.498069					196			433			0.452656				275			503			0.54672
	178				382		0.465969			290				486		0.596708					184			370			0.497297				246			441			0.557823
	188				465		0.404301			280				473		0.591966					186			372			0.5				369			528			0.698864
										309				443		0.697517					175			372			0.47043				275			534			0.514981
										311				474		0.656118					176			480			0.366667				342			478			0.715481
										217				471		0.460722					347			549			0.632058				325			523			0.621415
										261				454		0.57489					264			549			0.480874				222			472			0.470339
										329				461		0.713666															225			496			0.453629
										341				549		0.621129															223			463			0.481641
										273				495		0.551515															241			498			0.483936
	179.2				430.8		0.419176			288.333				477.417		0.606052					215.889			433.222			0.49857				274.5			490.25			0.558549

## Sheet: Lefty1
																			70%epiboly
		SF			CF
		302.526			358.096
		256.131			416.656
		219.404			469.286
		180.637			318.327
		347.966			178.914							SF									CF										Hyb SF										Hyb CF
Julien		257.207			384.049
		240.808			533.65						Distance leading cell			distance animal extreme			Ratio			Distance leading cell			distance animal extreme			Ratio				Distance leading cell			distance animal extreme				Ratio			Distance leading cell			distance animal extreme				Ratio
		355.646			269.11
		211.255			340.846							259		456			0.567982			339			458			0.740175					383			491			0.780041				350		467				0.749465
		448.782			489.286							317		468			0.67735			425			481			0.883576					378			562			0.672598				419		572				0.732517
		202.604			235.751							211		387			0.54522			351			486			0.722222					237			505			0.469307				341		518				0.658301
		297.2			272.026							340		535			0.635514			362			464			0.780172					193			499			0.386774				451		520				0.867308
		268.96			275.768							266		496			0.53629			469			558			0.840502					227			501			0.453094				315		533				0.590994
		164.29			282.959							294		499			0.589178			439			538			0.815985					416			570			0.729825				396		446				0.887892
		291.038			439.159							378		502			0.752988			452			484			0.933884					325			499			0.651303				452		490				0.922449
		157.061			483.042							269		434			0.619816			294			484			0.607438					188			483			0.389234				372		514				0.723735
		427.855			437.824							287		431			0.665893			448			507			0.883629					409			509			0.803536				490		529				0.926276
		398.988			436.695							310		452			0.685841			418			579			0.721934					291			427			0.681499				389		485				0.802062
		257.204			418.464							315		538			0.585502			278			502			0.553785					242			445			0.54382				450		531				0.847458
		431.037			338.472							273		500			0.546			342			446			0.766816					396			534			0.741573				328		476				0.689076
		292.101																													419			493			0.849899				500		552				0.905797
		237.113																													364			513			0.709552				475		580				0.818966
		290.664																													270			476			0.567227				426		491				0.867617
		230.632																													414			603			0.686567				283		420				0.67381
		170.657																													381			496			0.768145
		179.542
												293.25		474.833			0.617298			388.636			503.727			0.771209					325.471			506.235			0.640235				402.312		507.75				0.791483
		224			334
		193			226
		262			414
		317			278
		340			442
		278			298																										227			398			0.570352				477		577				0.82669
		419			450							158		489			0.323108			362			456			0.79386					284			440			0.645455				287		499				0.57515
		264			385							274		557			0.491921			319			527			0.605313					221			453			0.487859				429		538				0.797398
		286			479							157		489			0.321063			445			593			0.750422					249			516			0.482558				354		451				0.784922
		301			432							398		490			0.812245			380			591			0.642978															347		518				0.669884
		387			349							386		526			0.73384			337			572			0.589161															282		476				0.592437
		275			427							261		513			0.508772			276			437			0.631579															486		575				0.845217
		320			357							404		560			0.721429			417			500			0.834															411		499				0.823647
		194										290		489			0.593047			481			585			0.822222															440		549				0.801457
		252										248		635			0.390551			421			595			0.707563															373		559				0.667263
												267		588			0.454082			408			588			0.693878															477		564				0.845745
												183		550			0.332727			409			521			0.785029															389		463				0.840173
												248		507			0.489152			335			551			0.607985															492		617				0.797407
												247		583			0.423671			495			595			0.831933															437		507				0.861933
												297		452			0.65708			272			541			0.502773															272		403				0.674938
												296		527			0.56167			352			477			0.737945															417		517				0.806576
												329		536			0.613806			474			581			0.815835															441		539				0.818182
												253		515			0.491262																								244		444				0.54955
												223		513			0.434698
												209		518			0.403475
												296		427			0.693208
												278		560			0.496429
												274		494			0.554656
												271.636		523.545			0.522813			386.438			544.375			0.70953					245.25			451.75			0.546556				391.944		516.389				0.754365
																				50% epiboly
											SF									CF
										Distance leading cell			distance animal extreme			Ratio			Distance leading cell			distance animal extreme			Ratio
										105			351			0.299145
										80			572			0.13986			63			392			0.160714
										84			315			0.266667			97			457			0.212254
										73			349			0.209169			97			366			0.265027
										81			471			0.171975			101			421			0.239905
										169			457			0.369803			80			430			0.186047
										122			422			0.2891			108			420			0.257143
										158			397			0.397985			150			438			0.342466
										75			437			0.171625			153			464			0.329741
										98			332			0.295181			86			441			0.195011
										117			460			0.254348			223			472			0.472458
										92			382			0.240838			104			448			0.232143
										109			441			0.247166			126			404			0.311881
										80			366			0.218579			119			408			0.291667
										86			420			0.204762			131			460			0.284783
																			120			343			0.349854
										132			361			0.365651			127			384			0.330729
										84			328			0.256098			214			501			0.427146
										70			430			0.162791			129			393			0.328244
										60			441			0.136054			100			492			0.203252
										113			384			0.294271			185			420			0.440476
										84			335			0.250746			132			413			0.319613
										85			401			0.21197			113			423			0.267139
										78			377			0.206897			177			408			0.433824
										77			382			0.201571			148			424			0.349057
										50			320			0.15625			75			392			0.191327
										51			301			0.169435			102			430			0.237209
										63			438			0.143836			102			545			0.187156
																			99			407			0.243243
																			71			285			0.249123
																			61			308			0.198052
																			84			361			0.232687
																			58			345			0.168116
																			86			423			0.20331
																			66			326			0.202454
																0.23451			67			324			0.20679
																			167			380			0.439474
																			75			364			0.206044
																			88			341			0.258065
																			91			369			0.246612
																			63			361			0.174515
																			91			368			0.247283
																			158			433			0.364896
																			94			414			0.227053
																			99			385			0.257143
																			93			341			0.272727
																			124			352			0.352273
																			88			368			0.23913
																			91			335			0.271642
																			90			339			0.265487
																			70			392			0.178571
																			114			348			0.327586
																			70			367			0.190736
																									0.270563

## Sheet: MyoD
		70%epib
					SF									CF
		distance central gap					height					distance central gap				height
		306				92	67		79.5			201			81	237		159
		228				98	106		102			279			103	154		128.5
		289				98	93		95.5			167			162	151		156.5
		122				122	110		116			203			141	150		145.5
		340				75	85		80			353			94	112		103
		170				104	118		111			230			175	143		159
		176				112	116		114			181			171	159		165
		271				144	154		149			203			176	173		174.5
		290				101	91		96			209			126	112		119
		278				103	81		92			161			164	215		189.5
		304				51	76		63.5			179			101	75		88
		New quantification			70% epiboly
							SF															CF
		Distance central gap			total width		Ratio width		Height 1	Height 2			Height to animal		ratio height		Distance central gap			total width				Height 1	Height 2			Height to animal
		155			603		0.257048		99	117	108		465		0.232258			189		655		0.28855		116	208	162		469		0.345416
		157			629		0.249603		126	121	123.5		574		0.215157			256		732		0.349727		94	128	111		470		0.23617
		249			678		0.367257		142	137	139.5		597		0.233668			150		638		0.23511		146	134	140		489		0.286299
		272			649		0.419106		102	86	94		501		0.187625			196		684		0.28655		124	128	126		465		0.270968
		270			615		0.439024		81	68	74.5		411		0.181265			210		712		0.294944		134	149	141.5		545		0.259633
		326			628		0.519108		87	86	86.5		461		0.187636			314		731		0.429549		81	95	88		457		0.19256
		279			641		0.435257		64	89	76.5		402		0.190299			168		700		0.24		164	144	154		451		0.341463
		216			677		0.319055		92	86	89		438		0.203196			181		663		0.273002		155	151	153		447		0.342282
		275			601		0.457571		84	86	85		472		0.180085			191		694		0.275216		113	103	108		459		0.235294
		178			633		0.281201		89	97	93		510		0.182353			152		597		0.254606		161	204	182.5		421		0.433492
		322			628		0.512739		65	79	72		429		0.167832			160		694		0.230548		76	96	86		479		0.179541
		245.364			634.727		0.386997				94.6818		478.182		0.196488			197		681.818		0.287073				132		468.364		0.28392
		New quantification			80% epiboly
							SF															CF
		Distance central gap			total width		Ratio width		Height 1	Height 2			Height to animal		ratio height		Distance central gap			total width				Height 1	Height 2			Height to animal
		178			686		0.259475		159	131	145		513		0.282651			99		683		0.144949		241	214	227.5		526		0.43251
		228			676		0.337278		103	102	102.5		548		0.187044			215		649		0.331279		135	212	173.5		580		0.299138
		194			700		0.277143		134	147	140.5		605		0.232231			193		676		0.285503		219	188	203.5		457		0.445295
		181			632		0.286392		154	168	161		584		0.275685			103		628		0.164013		262	313	287.5		611		0.47054
		211			653		0.323124		91	116	103.5		487		0.212526			172		647		0.265842		189	183	186		520		0.357692
		207			686		0.301749		142	154	148		524		0.282443			74		670		0.110448		301	254	277.5		649		0.427581
		203			609		0.333333		167	150	158.5		558		0.28405			102		662		0.154079		220	218	219		553		0.396022
		186			703		0.26458		141	125	133		581		0.228916			131		659		0.198786		274	254	264		564		0.468085
		172			700		0.245714		120	149	134.5		557		0.241472			126		689		0.182874		189	222	205.5		620		0.331452
		250			684		0.365497		150	151	150.5		615		0.244715			227		645		0.351938		137	177	157		580		0.27069
		186			618		0.300971		131	129	130		545		0.238532			118		634		0.18612		271	284	277.5		588		0.471939
		256			720		0.355556		112	105	108.5		591		0.183587			110		634		0.173502		279	254	266.5		617		0.431929
		171			663		0.257919		141	155	148		539		0.274583			189		623		0.303371		109	230	169.5		580		0.292241
		244			686		0.355685		115	140	127.5		516		0.247093
		204.786			672.571		0.304601		132.857	137.286	135.071		554.5		0.243966			143		653.769		0.219439		217.385	231	224.192		572.692		0.391932

## Sheet: msgn1
		70%epiboly
	SF		CF
	269		216
	260		145
	231		186
	390		425
	446		391
	283		266
	216		186
	184		350
	86		319
	260
	New quantification			70% epiboly
						SF															CF
	Distance central gap			total width		Ratio width		Height 1	Height 2			Height to animal		ratio height		Distance central gap			total width				Height 1	Height 2			Height to animal
	225			618		0.364078		82	86	84		481		0.174636			350		779		0.449294		92	100	96		561		0.171123
	184			681		0.270191		89	90	89.5		535		0.16729			217		721		0.300971		79	85	82		414		0.198068
	123			633		0.194313		152	157	154.5		545		0.283486			154		673		0.228826		130	117	123.5		498		0.247992
	262			627		0.417863		71	69	70		437		0.160183			199		636		0.312893		78	99	88.5		525		0.168571
	266			621		0.428341		64	79	71.5		516		0.138566			280		730		0.383562		131	105	118		534		0.220974
	286			675		0.423704		105	86	95.5		506		0.188735			313		732		0.427596		82	115	98.5		496		0.198589
	214			659		0.324734		60	66	63		548		0.114964			206		683		0.301611		100	81	90.5		537		0.168529
	277			604		0.458609		74	73	73.5		439		0.167426
	256			680		0.376471		123	147	135		494		0.273279			219		704		0.31108		109	108	108.5		516		0.210271
	224			649		0.345146		139	144	141.5		494		0.286437			273		704		0.387784		103	105	104		528		0.19697
	178			650		0.273846		131	131	131		506		0.258893			230		727		0.316369		89	94	91.5		486		0.188272
	209			662		0.31571		133	131	132		531		0.248588			233		674		0.345697		116	96	106		491		0.215886
	175			666		0.262763		129	143	136		439		0.309795			269		673		0.399703		90	95	92.5		517		0.178917
	227			684		0.331871		149	155	152		579		0.262522			256		654		0.391437		88	94	91		501		0.181637
	214			720		0.297222		134	120	127		494		0.257085			225		696		0.323276		123	118	120.5		572		0.210664
	199			650		0.306154		130	134	132		497		0.265594			150		637		0.235479		135	156	145.5		548		0.265511
	274			694		0.394813		134	129	131.5		504		0.260913			196		600		0.326667		124	153	138.5		603		0.229685
	206			649		0.317411		136	133	134.5		531		0.253296
	222.167			656.778		0.339069		113.056	115.167	114.111		504.222		0.226205			235.625		688.938		0.34014		104.312	107.562	105.938		520.438		0.203229
	New quantification			70% epiboly
						SF															CF
	Distance central gap			total width		Ratio width		Height 1	Height 2			Height to animal		ratio height		Distance central gap			total width				Height 1	Height 2			Height to animal
	261			693		0.376623		69	95	82		610		0.134426		253			727		0.348006		92	115	103.5		561		0.184492
	155			601		0.257903		97	101	99		628		0.157643		147			687		0.213974		113	131	122		614		0.198697
	185			698		0.265043		149	159	154		631		0.244057		154			639		0.241002		195	149	172		657		0.261796
	202			618		0.326861		120	142	131		583		0.2247		142			673		0.210996		169	169	169		627		0.269537
	183			659		0.277693		132	143	137.5		578		0.237889		165			657		0.251142		143	196	169.5		553		0.30651
	142			668		0.212575		117	125	121		532		0.227444		136			656		0.207317		156	122	139		606		0.229373
	207			678		0.30531		106	101	103.5		502		0.206175		102			620		0.164516		254	248	251		590		0.425424
	259			674		0.384273		113	107	110		513		0.214425		215			620		0.346774		117	112	114.5		579		0.197755
	280			648		0.432099		119	97	108		537		0.201117		123			696		0.176724		155	196	175.5		608		0.288651
																86			640		0.134375		280	272	276		598		0.461538
																124			645		0.192248		169	166	167.5		566		0.295936
																230			668		0.344311		138	117	127.5		644		0.197981
	208.222			659.667		0.315376		113.556	118.889	116.222		568.222		0.20532		159.667			663.889		0.235949		154.889	159.778	165.583		599.444		0.276474

## Sheet: Chordin
					50%epiboly														70%epiboly
		SF								CF						SF					CF
	Angle	height	total		Ratio			Angle	height	total		Ratio				height	total	Ratio		height	total
	50	174	440		0.395455			48	192	447		0.42953				258	495	0.521212		285	522	0.545977
	48	172	392		0.438776			44	209	430		0.486047				280	530	0.528302		330	468	0.705128
	48	251	514		0.488327			52	256	464		0.551724				256	504	0.507937		344	558	0.616487
	46	182	453		0.401766			38	227	432		0.525463				196	428	0.457944		233	535	0.435514
	50	214	419		0.51074			46	154	368		0.418478				277	394	0.703046		287	469	0.61194
	43	198	339		0.584071			45	253	425		0.595294				239	497	0.480885		304	487	0.62423
	53	181	354		0.511299			43	243	443		0.548533				246	457	0.538293		280	505	0.554455
	53	188	393		0.478372			47	215	431		0.49884				227	449	0.505568		354	600	0.59
	55	192	427		0.449649			42	209	367		0.569482				235	459	0.511983		289	472	0.612288
	50	189	323		0.585139			44	208	409		0.508557				225	469	0.479744		315	463	0.680346
	53	151	369		0.409214			41	171	407		0.420147				220	486	0.452675		272	468	0.581197
	52	169	456		0.370614			60	217	379		0.572559				262	546	0.479853		254	464	0.547414
	52	152	406		0.374384			55	210	463		0.453564				230	386	0.595855		324	524	0.618321
	58	218	406		0.536946			43	196	400		0.49				225	453	0.496689		312	530	0.588679
	63	165	494		0.334008			50	223	490		0.455102				246	491	0.501018		319	457	0.698031
	58	178	368		0.483696			49	167	378		0.441799				272	474	0.57384		243	497	0.488934
	58	164	449		0.365256			55	182	404		0.450495				276	440	0.627273		245	472	0.519068
		220	473		0.465116			45								274	525	0.521905		304	561	0.541889
								42								224	444	0.504505		269	451	0.596452
								56								243	473	0.513742		308	499	0.617234
																				218	475	0.458947
	52.3529				0.454601			47.25				0.495036				245.55	470	0.525113		289.952	498.905	0.582502

## Sheet: Nog1
noggin1 70%epiboly
	SF		CF
	298		494
	199		345
	265		411
	328		453
	215		457
	321		401
	433		285
	276		337
	282
	283
	186

## Sheet: HCRT
SF 07			Hyb SF 09			Hyb CF 8			CF 07
	18			26			19			35
	13			16			22			26
	27			17			19			23
	23			18			22			31
	18			15			17			26
	28			21			22			23
	14			21			23			21
	24			20			21			15
	14			20			25			26
	17			25			15
	16			21			27
							26
SF 09			Hyb SF 10			Hyb CF 10			CF 08
	27			12			18			29
	20			18			20			32
	20			16			13			16
	21			20			21			25
	28			22			15			23
	17			17			16			16
	17			22			23			22
	14			15			19			18
	21			21			21			29
	17			11			18			26
	20			18			23			26
	23						19			22
SF 03			Hyb SF 03
	17			15			28			26
	13			21			30			30
	24			16			27			30
	22			18			18			39
	19			14			23			28
	12			19			30			30
	15			22			22			30
	23			22			29			23
	15			25			19			27
	18			17			18			25
	17			15			29			29
				19			29			20
	19.1765			18.6765			21.8333			25.6667
								22.4216

[truncated: 24 more sheets: NPY, Shh 24hpf, OE, eye 24hpf, pax2a 48hpf, apoptosis 2dpf, apoptosis 3dop, EYA2, Lhx7, Dkk1b 70%epib, Lhx9, SHH 10hpf, HCRT (2), NPY (2), Shh 24hpf (2), OE (2), eye 24hpf (2), EYA2 (2), Lhx7 (2), Dkk1b 70%epib (2) …]
